# Supplementary material for: Design and characterization of multi-component lamellar materials based on MWW-type zeolitic layers and metal oxide sub-domains
Source: Royal Society of Chemistry journal article supplement (doi:10.1039/d4ma00942h), 2024-01-01
Supplement: d4ma00942h1.pdf [file d4ma00942h1.pdf]

## Supplementary Information

### Design and Characterization of Multi-Component Lamellar Materials Based on MWW-Type Zeolitic Layers and Metal Oxide Sub-domains

Cristina Esteban, Alexandra Velty\*, Urbano Díaz\*

Instituto de Tecnología Química, Universitat Politècnica de València, Agencia Estatal Consejo Superior de Investigaciones Científicas, 46022 Valencia, Spain

\* Corresponding Author: [udiaz@itq.upv.es](mailto:udiaz@itq.upv.es), [avelty@itq.upv.es](mailto:avelty@itq.upv.es)

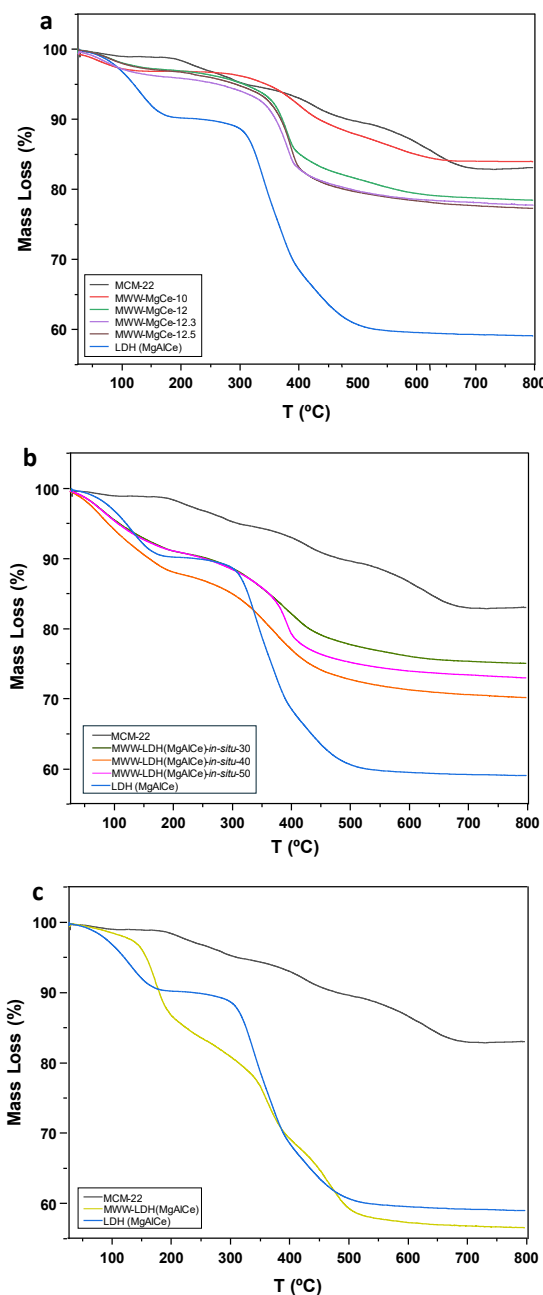

**Figure S1.** Thermogravimetric analysis (TGA). (a) As-synthesized multi-component MWW-MgCe materials obtained through method (I) at different pHs for the formation of metallic oxide sub-domains. (b) As-synthesized multi-component MWW-LDH-*in-situ* materials obtained following synthesis method (II). (c) As-synthesized multi-component MWW-LDH materials obtained following synthesis method (III).

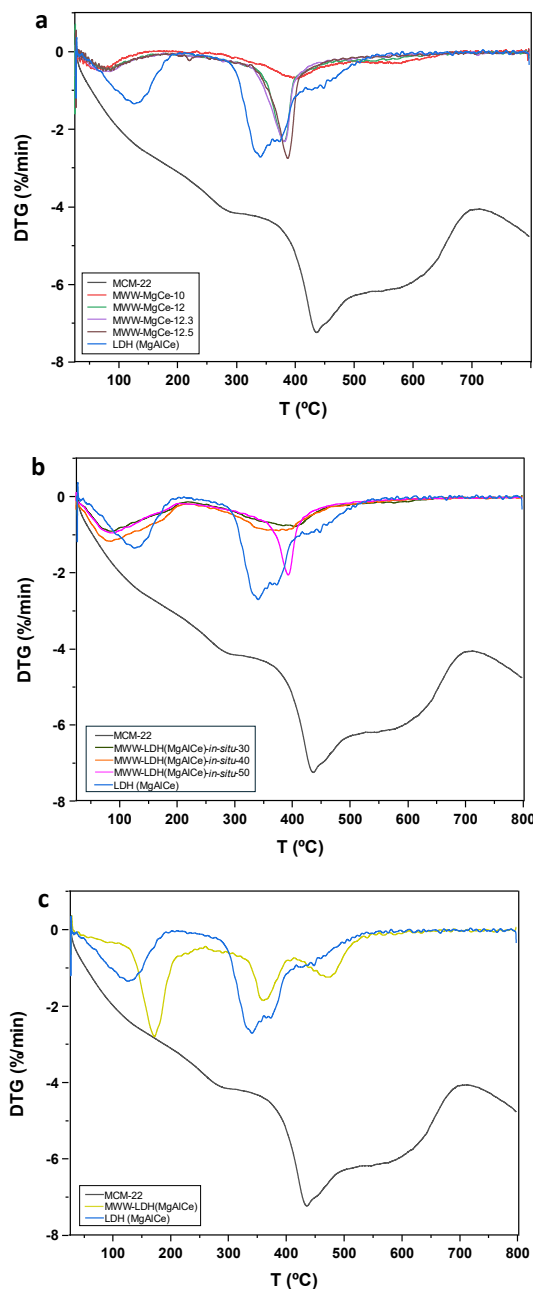

**Figure S2.** Derivative curves (DTA) from thermogravimetric analysis (TGA). (a) As-synthesized multi-component MWW-MgCe materials obtained through method (I) at different pHs for the formation of metallic oxide sub-domains. (b) As-synthesized multi-component MWW-LHD-*in-situ* materials obtained following synthesis method (II) with different LDH content. (c) As-synthesized multi-component MWW-LHD materials obtained following synthesis method (III).

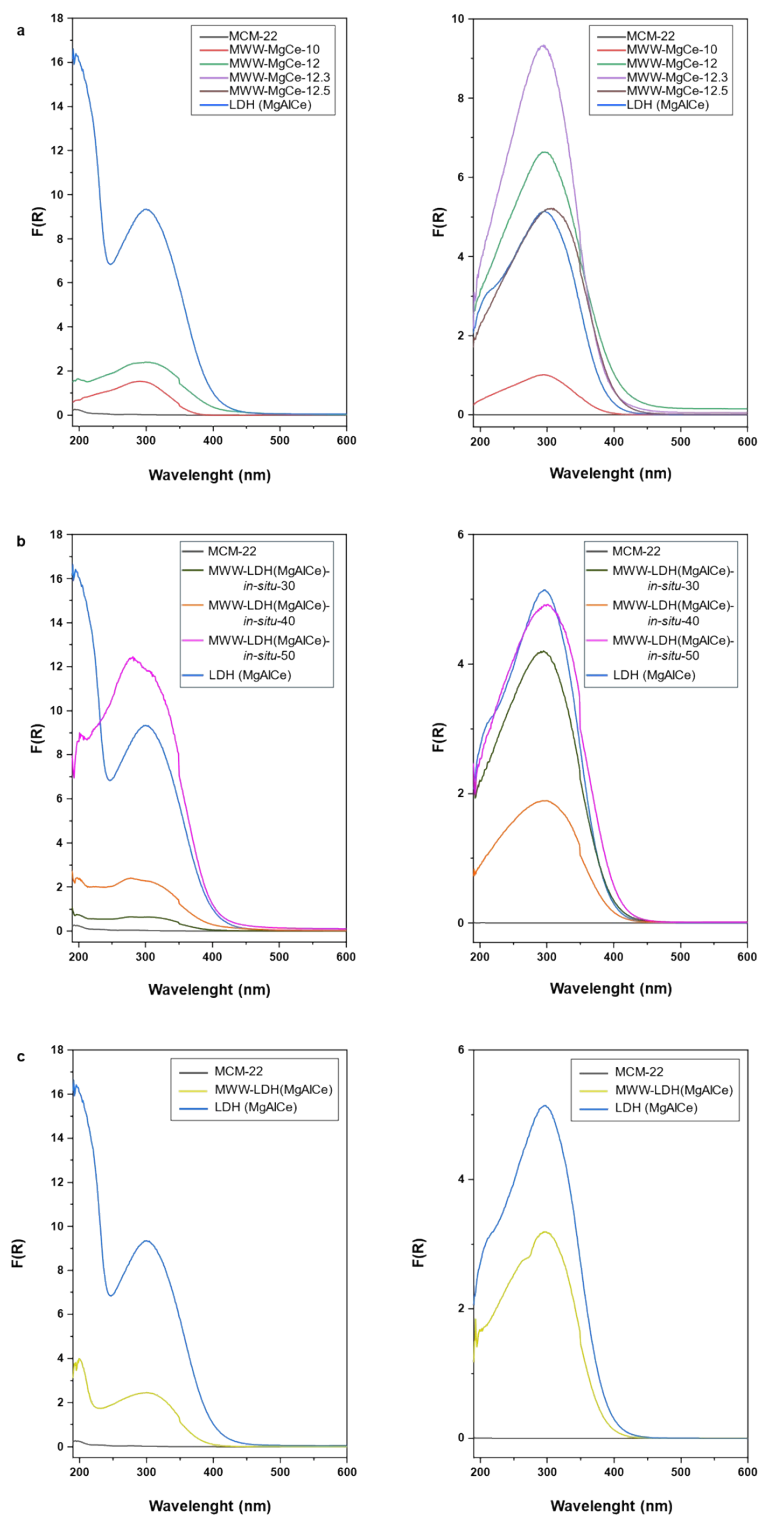

**Figure S3.** UV-Visible spectra of as-synthesized (left) and calcined (right) samples. (a) Multi-component MWW-MgCe materials obtained through method (I) at different pHs for the formation of metallic oxide sub-domains. (b) Multi-component MWW-LDH-*in-situ* materials obtained following synthesis method (II) with different LDH content. (c) Multi-component MWW-LDH materials obtained following synthesis method (III).

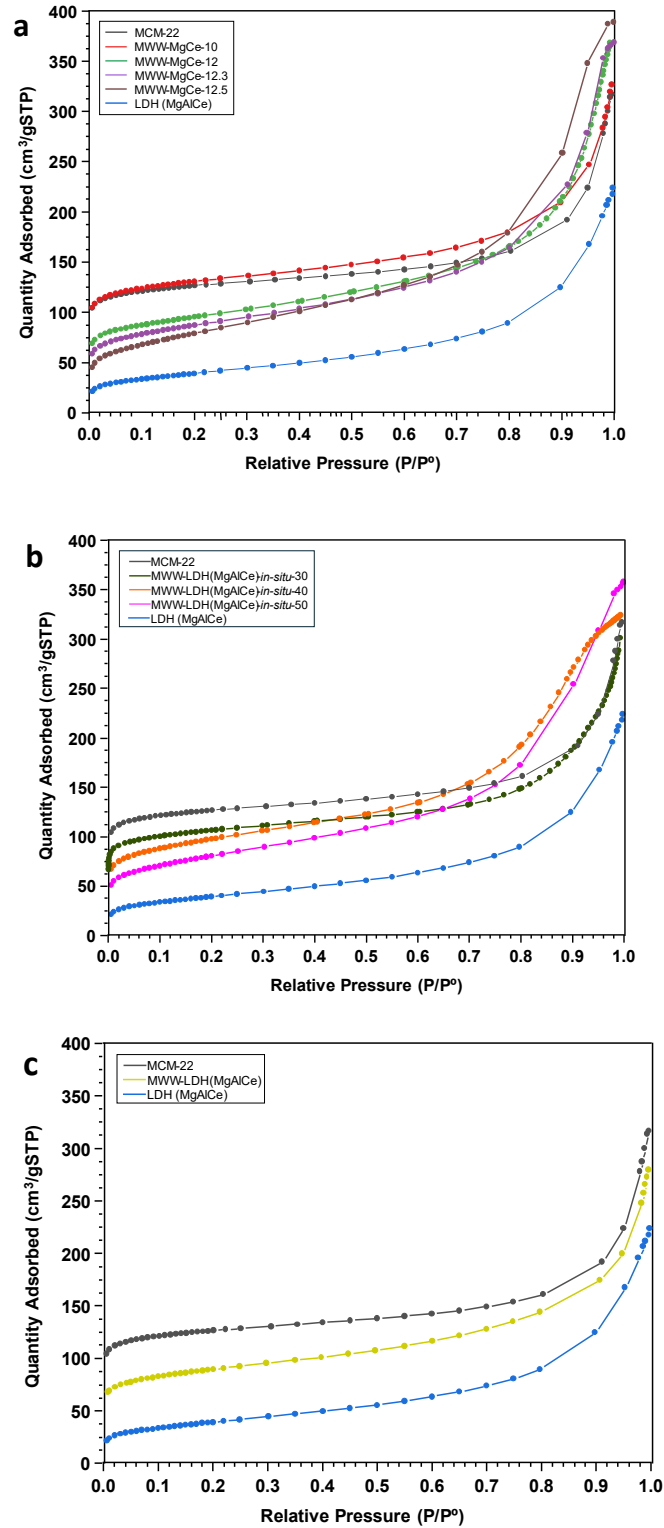

**Figure S4.** N<sub>2</sub> adsorption isotherms. (a) Multi-component MWW-MgCe materials obtained through method (I) at different pHs for the formation of metallic oxide sub-domains. (b) Multi-component MWW-LDH-*in-situ* materials obtained through method (II) with different LDH contents. (c) Multi-component MWW-LDH materials obtained following synthesis method (III).

**Table S1.** Ammonia desorbed quantity estimated from thermoprogrammed desorption analyses (TPD) of multi-component MWW-MgCe, MWW-LDH-*in-situ* and MWW-LDH materials, obtained following synthesis methods (I), (II) and (III), respectively.

| <b>Material</b>                     | <b>Temperature<br/>(°C)<sup>1</sup></b> | <b>NH<sub>3</sub> Quantity<br/>(cm<sup>3</sup>/g)</b> |
|-------------------------------------|-----------------------------------------|-------------------------------------------------------|
| MCM-22                              | 361                                     | 29.3                                                  |
| LDH (MgAlCe)                        | 315                                     | 91.3                                                  |
| <i>MWW-MgCe materials</i>           |                                         |                                                       |
| MWW-MgCe-10                         | 204                                     | 27.8                                                  |
| MWW-MgCe-12                         | 360                                     | 122.4                                                 |
| MWW-MgCe-12.3                       | 399                                     | 130.3                                                 |
| MWW-MgCe-12.5                       | 369                                     | 136.1                                                 |
| <i>MWW-in-situ materials</i>        |                                         |                                                       |
| MWW-LDH(MgAlCe)- <i>in-situ</i> -30 | 336.4                                   | 60.8                                                  |
| MWW-LDH(MgAlCe)- <i>in-situ</i> -40 | 287.3                                   | 69.4                                                  |
| MWW-LDH(MgAlCe)- <i>in-situ</i> -50 | 328.0                                   | 77.9                                                  |
| <i>MWW-LDH materials</i>            |                                         |                                                       |
| MWW-LDH                             | 349.6                                   | 93.0                                                  |

<sup>1</sup>Temperature of main desorption peak of the samples.

**Table S2.** Bandgap ( $E_g$ ) of the multi-component materials based on MWW layers and LDH (MgAlCe) sub-domains.

| <b>Material</b>                  | <b><math>E_g</math> (eV)<sup>1</sup></b> |
|----------------------------------|------------------------------------------|
| MCM-22                           | 4.57                                     |
| LDH (MgAlCe)                     | 2.78                                     |
| <i>MWW-MgCe materials</i>        |                                          |
| MWW-MgCe-12                      | 2.45                                     |
| <i>MWW-LHD-in-situ materials</i> |                                          |
| MWW-LDH(MgAlCe)-in-situ-30       | 2.73                                     |
| MWW-LDH(MgAlCe)-in-situ-40       | 2.65                                     |
| MWW-LDH(MgAlCe)-in-situ-50       | 2.55                                     |
| <i>MWW-LHD materials</i>         |                                          |
| MWW-LDH                          | 2.83                                     |

<sup>1</sup>Band gap estimated using Tauc method.
